# Supplementary material for: Modulation of the Gut Microbiota Structure and Function by Two Structurally Different Lemon Pectins
Source: MDPI journal article supplement (doi:10.3390/foods11233877), 2022-12-01
Supplement: s1 [file s1]

Supplementary Figure S1.

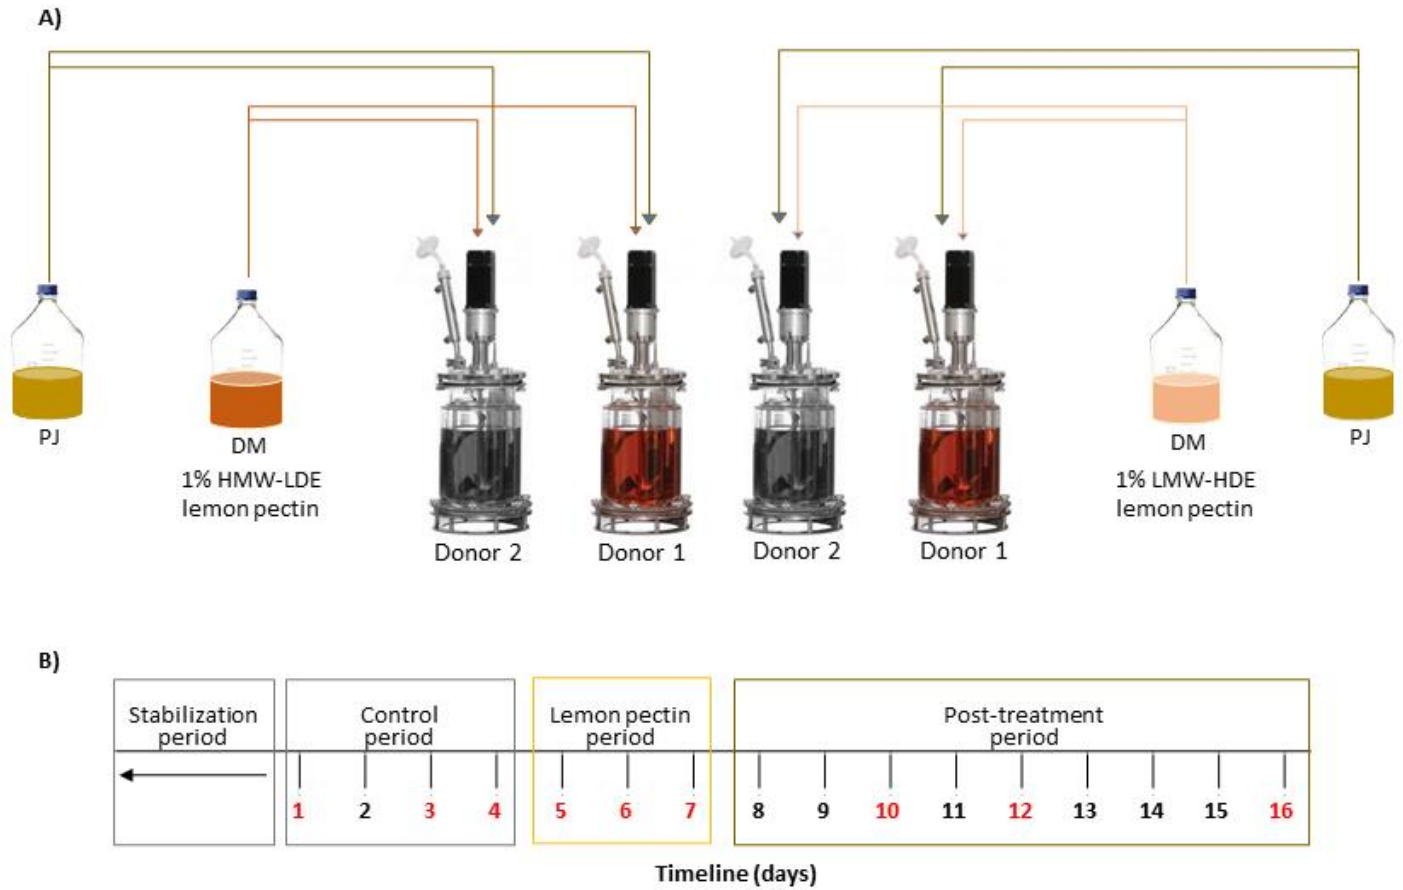

Supplementary Figure S1. Experimental design. A) Schematic of experimental set-up. B) Timeline for the experiment.

Supplementary Figure S2.

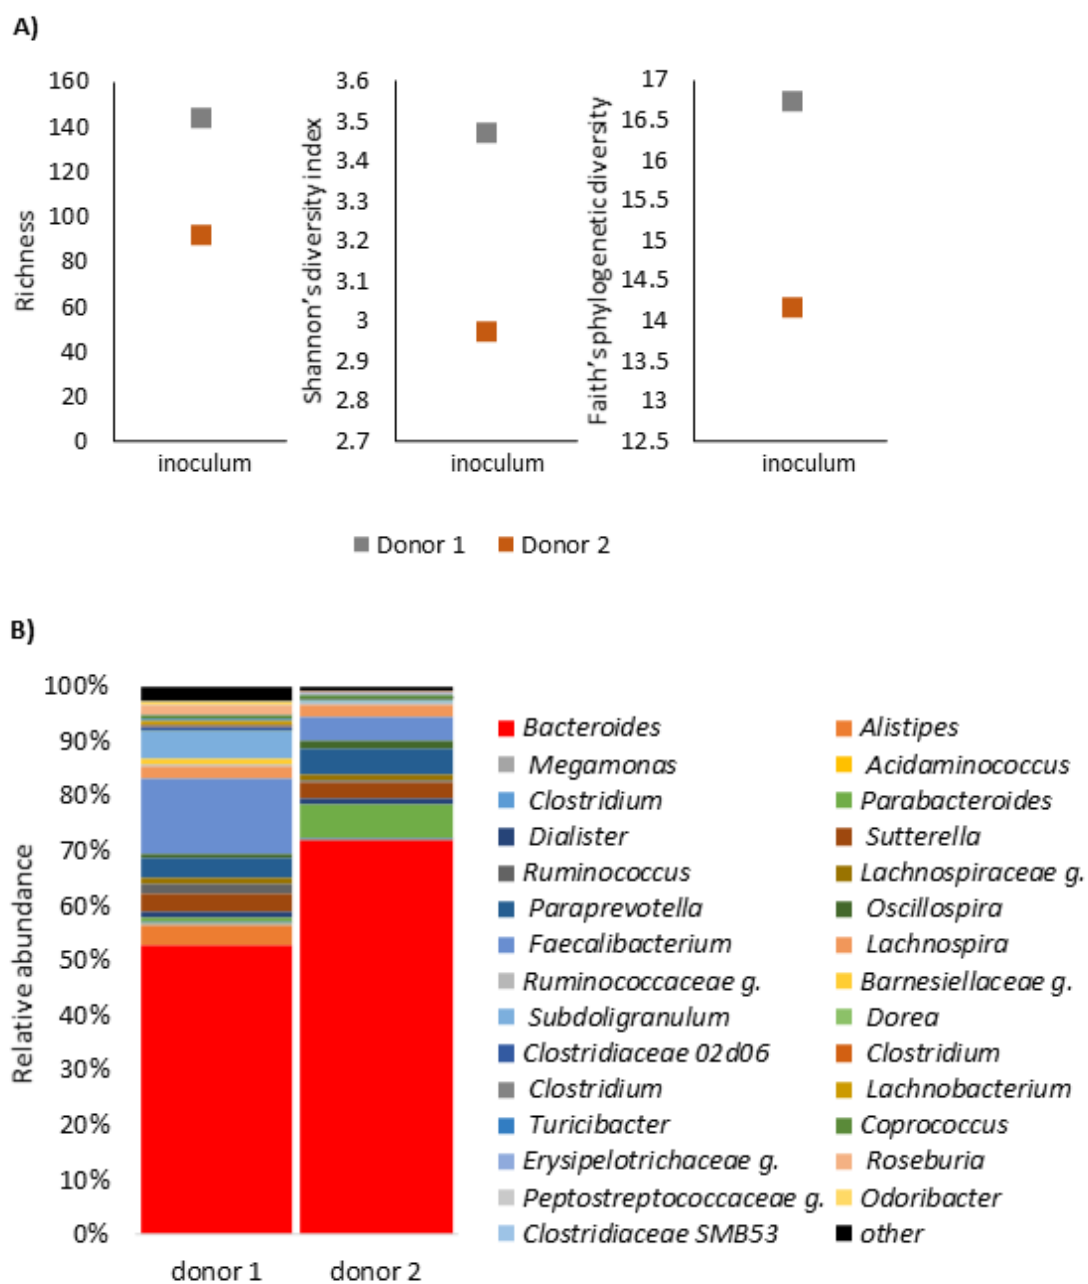

Supplementary Figure S2. Taxonomic composition of the fecal homogenates used for *in vitro* cultivation. A) Alpha diversity of each inoculum based on richness, Shannon's diversity index, and Faith's phylogenetic diversity. B) Relative abundance of genera present at greater than 0.1% abundance based on 16S rRNA gene sequencing.

Supplementary Table S1.

|                          | M <sub>w</sub> kDa* | GA, %** | DE, %*** |
|--------------------------|---------------------|---------|----------|
| Lemon pectin 1 (LMW-HDE) | 122                 | 64.7    | 66       |
| Lemon pectin 2 (HMW-LDE) | 308                 | 69.0    | 31       |

\* The average molar weight

\*\* Galacturonic acid content

\*\*\* Degree of esterification
